# Supplementary material for: An on-demand and on-site shape-designable mineralized hydrogel with calcium supply and inflammatory warning properties for cranial repair applications
Source: Royal Society of Chemistry journal article supplement (doi:10.1039/d2tb00456a), 2022-01-01
Supplement: d2tb00456a1.pdf [file d2tb00456a1.pdf]

## Supplementary information

# **On-demand & on-site shape-designed mineralized hydrogel with Calcium Supply and Inflammatory Warning properties facing to cranial repair application**

Xin Zhang, Cheng Wang, Jiangjie Wu, Ben Zheng, Huiwen He, Yanqin Shi, Meng  
Ma, Si Chen,\* and Xu Wang\*

*\*College of Materials Science and Engineering, Zhejiang University of Technology,  
Huzhou 313000, China*

*\*Corresponding authors:*

*E-mail addresses: chensi@zjut.edu.cn*

**Table 1.** Preparation and parameters of the XG mineralized hydrogels

| Sample                 | xanthan gum(g) | CaCO <sub>3</sub> (g) | lactic acid(mL) | water (g) | calcium lactate(g) | calcium lactate content(wt%) |
|------------------------|----------------|-----------------------|-----------------|-----------|--------------------|------------------------------|
| XG-hydrogel            | 0.40           | 0.00                  | 0.0             | 30.0      | 0.00               | 0.00                         |
| XG/Ca-13               | 0.40           | 1.50                  | 3.0             | 30.0      | 0.00               | 13.01                        |
| XG/Ca-27               | 0.40           | 3.00                  | 6.0             | 30.0      | 0.00               | 27.68                        |
| XG/Ca-39               | 0.40           | 4.50                  | 9.0             | 30.0      | 0.00               | 39.74                        |
| XG-Ca-50               | 0.40           | 6.00                  | 12.0            | 30.0      | 0.00               | 50.81                        |
| XG-CaCO <sub>3</sub>   | 0.40           | 1.50                  | 0.0             | 30.0      | 0.00               | 0.00                         |
| XG-Ca(LA) <sub>2</sub> | 0.40           | 0.00                  | 0.0             | 30.0      | 4.62               | 13.01                        |

\*the calcium lactate content was obtain by calculation

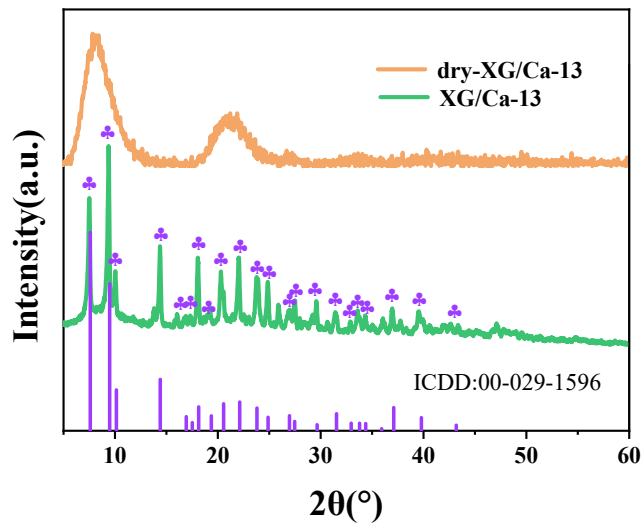

**Fig. S1.** XRD image of the XG/Ca-50 hydrogel

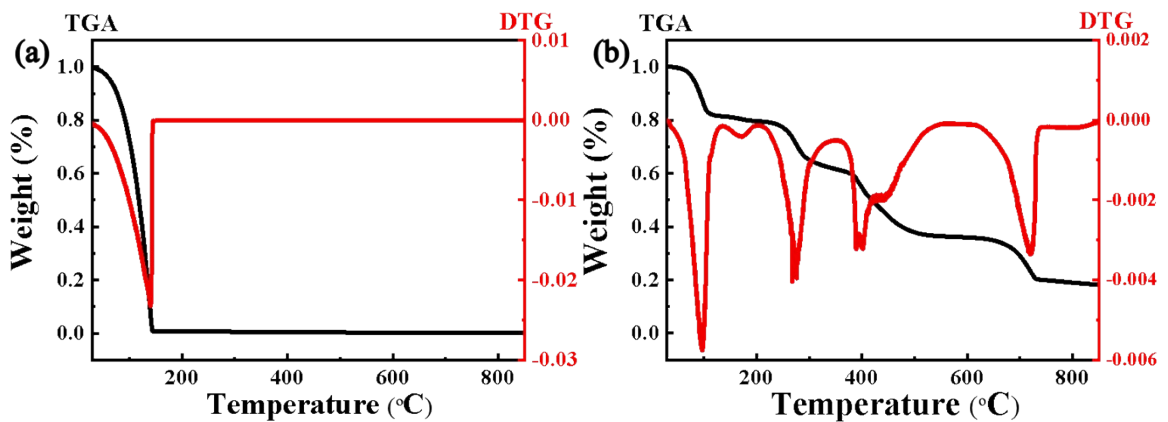

**Fig. S2.** TG image of the mineralized hydrogels(1-the XG hydrogel; 2-XG/Ca-50 hydrogel).

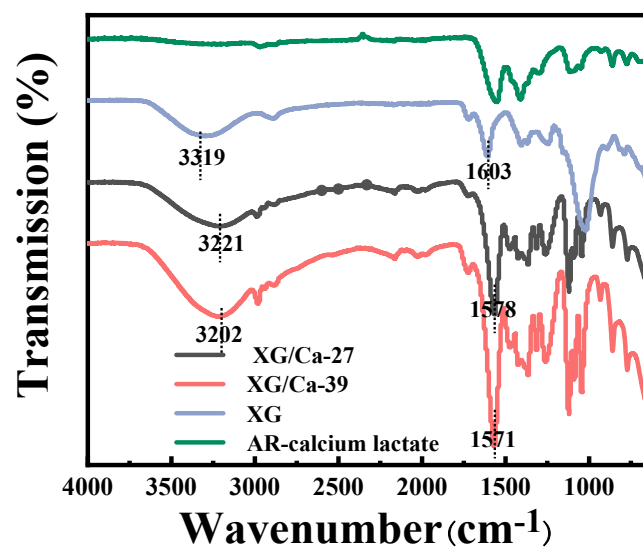

Fig. S3. FTIR image of the freeze-dried the different XG hydrogel.

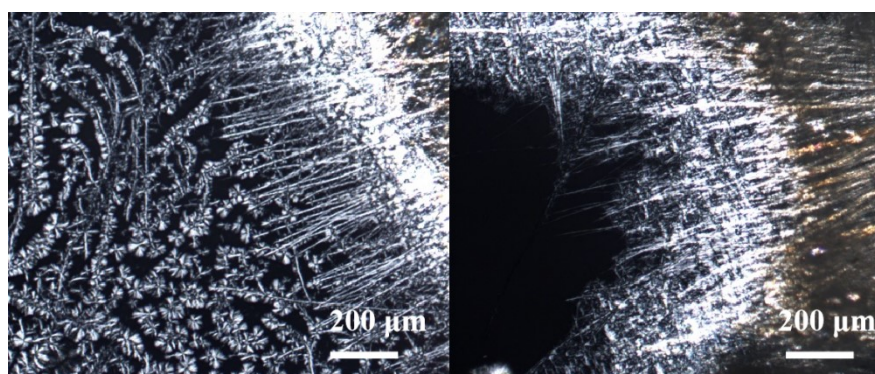

Fig. S4. POM image of the lactic acid solution.

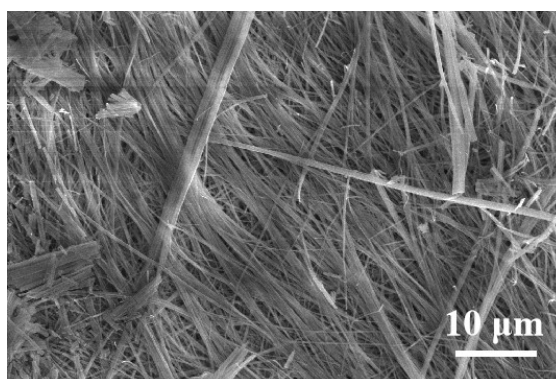

Fig. S5. SEM image of the different heating time of the freeze-dried XG/Ca(LA)<sub>2</sub> hydrogels.

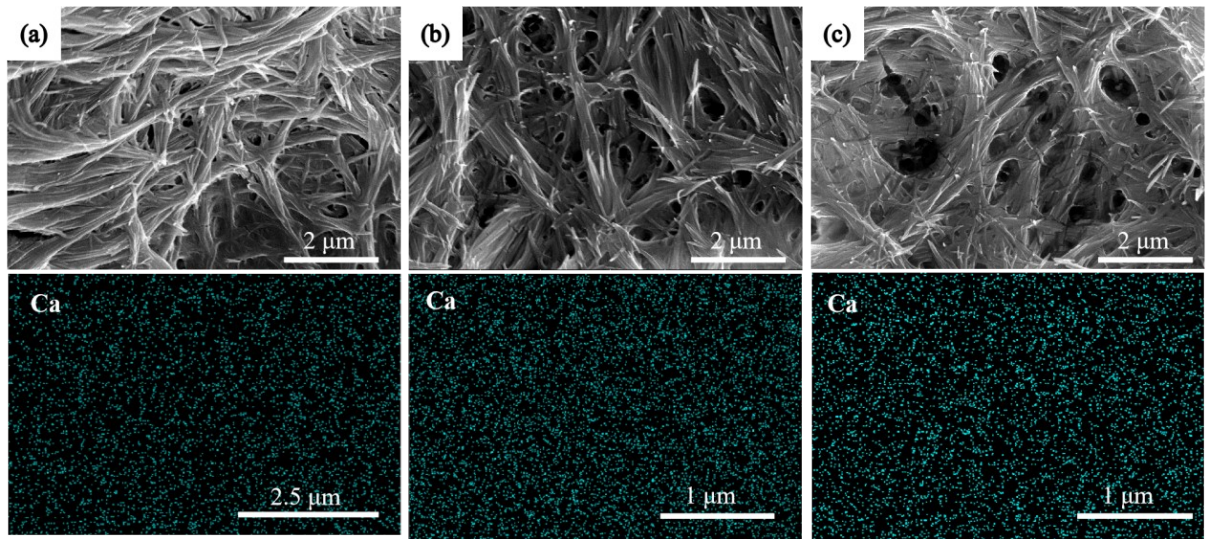

**Fig. S6.** SEM/EDS element mapping images of the different content of calcium lactate/XG/Ca-X hydrogels (a-27.68%; b-39.74%; c-50.81%).

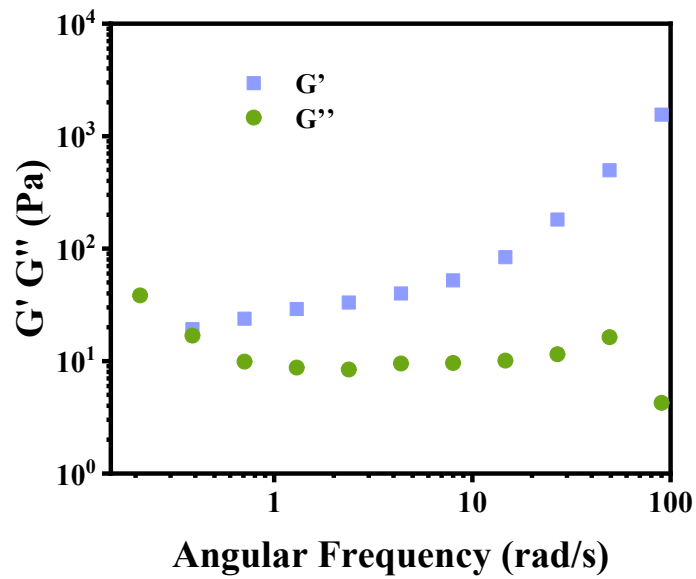

**Fig. S7.** Frequency of the storage ( $G'$ ) and loss ( $G''$ ) moduli of the XG hydrogel with  $\text{CaCl}_2$ (1.66 g) and calcium lactate(3 mL).

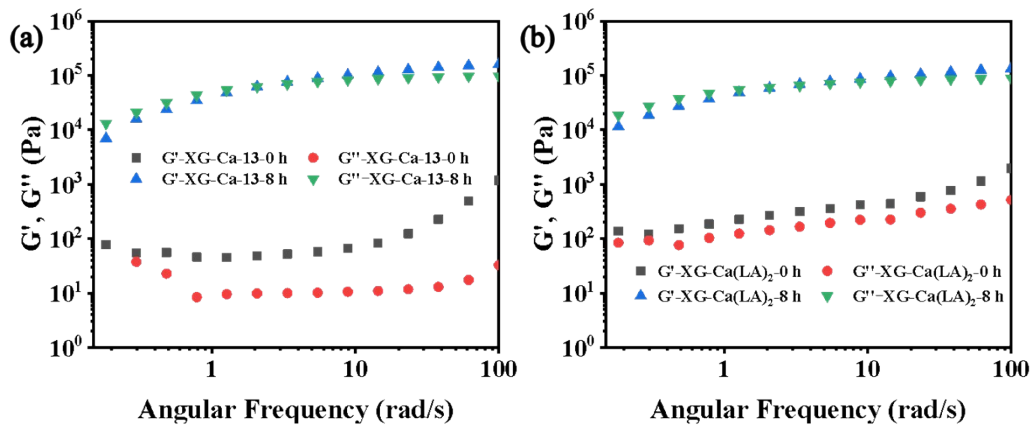

**Fig. S8.** (a) Frequency of the storage ( $G'$ ) and loss ( $G''$ ) moduli of the different heating time XG/Ca-13 hydrogels; (b) Frequency of the storage ( $G'$ ) and loss ( $G''$ ) moduli of the different heating time XG/Ca(LA)<sub>2</sub> hydrogels

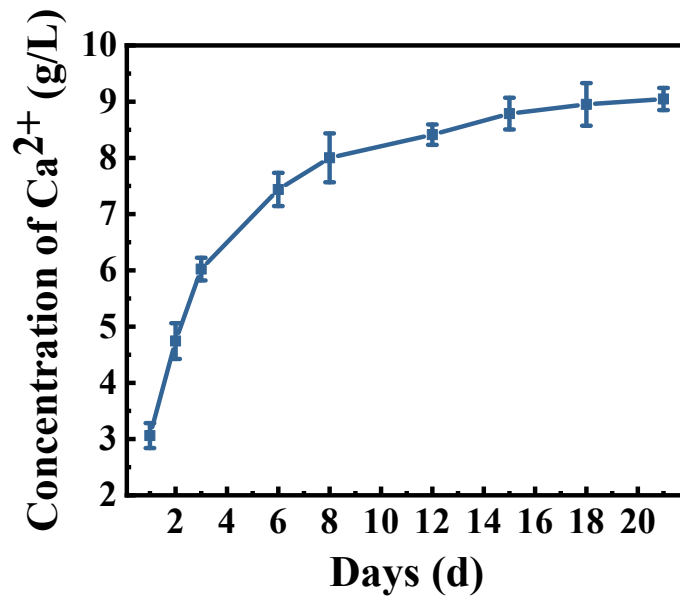

**Fig. S9.** Calcium ions release curves for the Ca-X hydrogel from 1 d to 21 d.

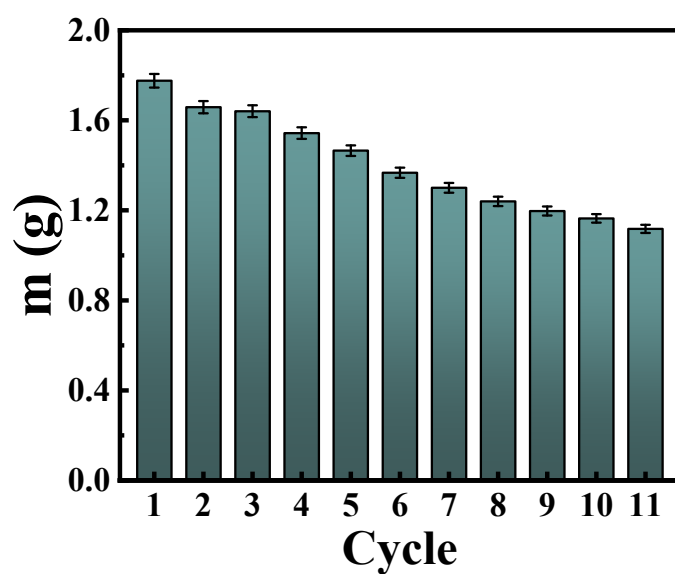

**Fig. S10.** The change of the XG/Ca-50 hydrogels mass with heating and cooling cycles

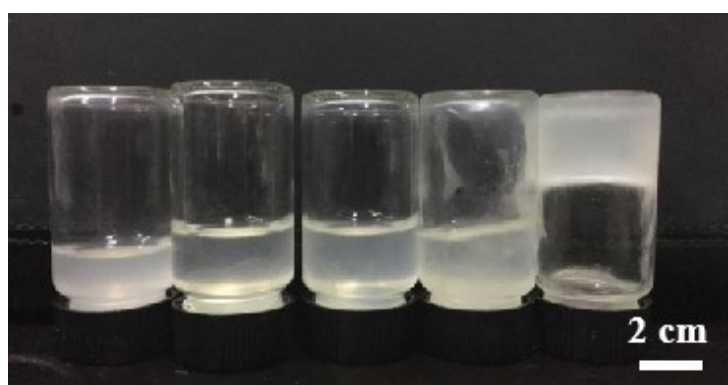

**Fig. S11.** The photo of xanthan gum hydrogel, the concentrations from left to right were 0.15 g/30 mL, 0.18 g/30 mL, 0.21 g/30 mL, 0.24 g/30 mL, and 0.27 g/30 mL, respectively.

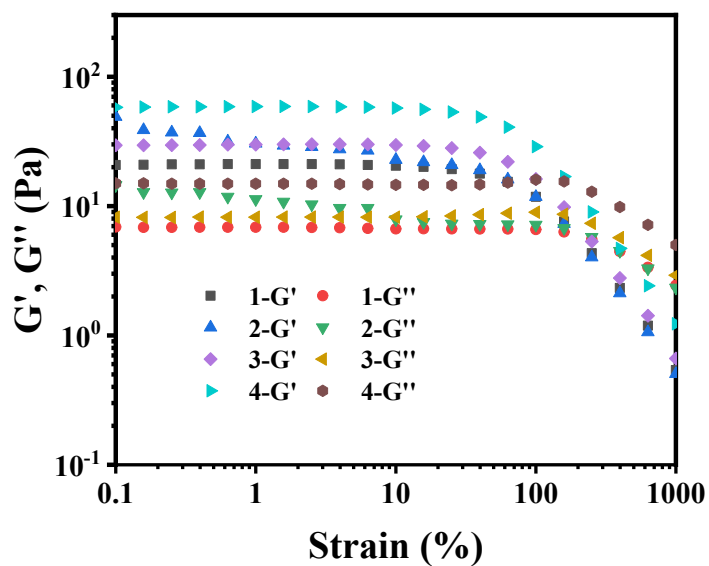

**Fig. S12.** The frequency(a) and strain(b) of the storage ( $G'$ ) and loss ( $G''$ ) moduli of the xanthan gum hydrogels (the content of XG: 1-0.30 g/30mL; 2-0.35 g/30mL; 3-0.40 g/30mL; 4-0.45 g/30mL).

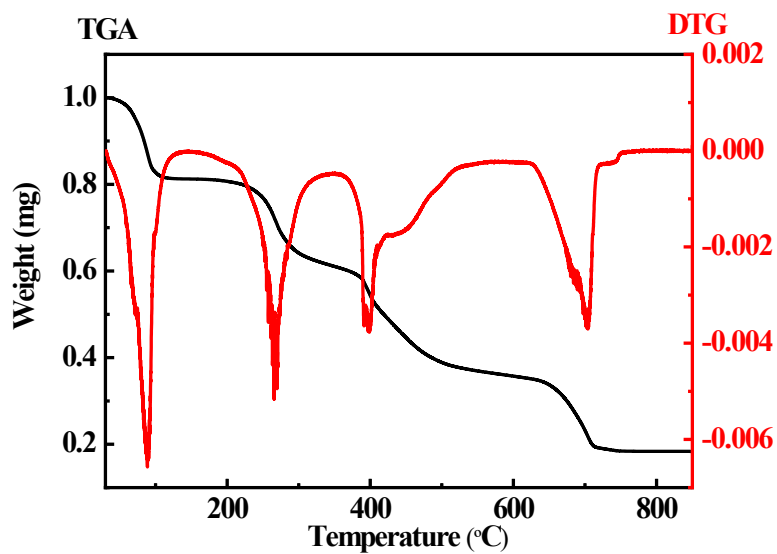

**Fig. S13.** The Tg of the XG-Ca(LA)<sub>2</sub> hydrogel.
